1     **TRIM5 $\alpha$  restriction of HIV-1-N74D viruses in lymphocytes is**  
2             **caused by a loss of cyclophilin A protection**

3  
4  
5     Anastasia Selyutina<sup>1</sup>, Lacy M. Simons<sup>2</sup>, Angel Bulnes-Ramos<sup>1</sup>, Judd F. Hultquist<sup>2</sup>, and  
6     Felipe Diaz-Griffero\*<sup>1</sup>

7  
8     <sup>1</sup>Department of Microbiology and Immunology, Einstein, Bronx, NY 10461, USA.

9     <sup>2</sup>Division of Infectious Diseases, Northwestern University Feinberg School of Medicine,  
10     Chicago, IL 60611, USA.

11  
12     **\*Corresponding author:**

13     Felipe Diaz-Griffero Ph.D.

14     Einstein

15     1301 Morris Park – Price Center 501

16     New York, NY 10461

17     Phone: (718) 678-1191

18     Email: [Felipe.Diaz-Griffero@einstein.yu.edu](mailto:Felipe.Diaz-Griffero@einstein.yu.edu)

19

20

21 **ABSTRACT**

22           The core of HIV-1 viruses bearing the capsid change N74D (HIV-1-N74D) do not  
23 bind the human protein cleavage and polyadenylation specificity factor subunit 6  
24 (CPSF6). In addition, HIV-1-N74D viruses have altered patterns of integration site  
25 preference in human cell lines. In primary human CD4<sup>+</sup> T cells, HIV-1-N74D viruses  
26 exhibit infectivity defects when compared to wild type. The reason for this loss of  
27 infectivity in primary cells is unknown. We first investigated whether loss of CPSF6  
28 binding accounts for the loss of infectivity. Depletion of CPSF6 in human CD4<sup>+</sup> T cells  
29 did not affect the early stages of wild-type HIV-1 replication, suggesting that defective  
30 infectivity in the case of HIV-1-N74D is not due to the loss of CPSF6 binding. Based on  
31 our previous result that cyclophilin A (Cyp A) protected HIV-1 from human tripartite  
32 motif-containing protein 5 $\alpha$  (TRIM5 $\alpha_{hu}$ ) restriction in CD4<sup>+</sup> T cells, we tested whether  
33 TRIM5 $\alpha_{hu}$  was involved in the decreased infectivity observed for HIV-1-N74D. Depletion  
34 of TRIM5 $\alpha_{hu}$  in CD4<sup>+</sup> T cells rescued the infectivity of HIV-1-N74D, suggesting that HIV-  
35 1-N74D cores interacted with TRIM5 $\alpha_{hu}$ . Accordingly, TRIM5 $\alpha_{hu}$  binding to HIV-1-N74D  
36 cores was increased compared with that of wild-type cores, and consistently, HIV-1-  
37 N74D cores lost their ability to bind Cyp A. In conclusion, we showed that the decreased  
38 infectivity of HIV-1-N74D in CD4<sup>+</sup> T cells is due to a loss of Cyp A protection from  
39 TRIM5 $\alpha_{hu}$  restriction activity.

40

41 **Keywords:** HIV-1; N74D; CPSF6; TRIM5 $\alpha_{hu}$ ; capsid; core; restriction

42

## 43 INTRODUCTION

44 Human cleavage and polyadenylation specificity factor subunit 6 (CPSF6) is a  
45 nuclear protein that belongs to the serine/arginine-rich protein family. Expression of a  
46 cytosolic fragment of CPSF6 [CPSF6(1–358)] was found to potently block human  
47 immunodeficiency virus-1 (HIV-1) infection before the formation of 2-long terminal  
48 repeat circles [1], and this inhibition of HIV-1 infection correlated with the ability of  
49 CPSF6(1-358) to bind to the capsid and prevent uncoating [2-4]. The serial passaging  
50 of HIV-1 in human cells overexpressing CPSF6(1-358) resulted in the generation of  
51 escape-mutant viruses bearing the N74D capsid change(HIV-1-N74D) [1], and binding  
52 studies of HIV-1 capsids with N74D mutations to CPSF6(1-358) demonstrated a lack of  
53 binding as the mechanism for escape [1, 2]. Although the overexpression of full-length  
54 CPSF6 remained nuclear and did not block HIV-1 infection, these experiments  
55 functionally linked CPSF6 to the HIV-1 capsid. Knockdown or knockout of human  
56 CPSF6 expression in different human cell lines did change HIV-1 integration site  
57 selection [2, 5-8]. Several reports have also suggested that full-length CPSF6 may  
58 facilitate the entry of the virus core into the nucleus [8-10]. The lack of a correlation  
59 between the loss of CPSF6 binding to HIV-1 and decreased infectivity in human cell  
60 lines indicates that cell-type specific differences in the pathways surrounding early  
61 replication contribute to these discrepancies, suggesting the need to work in primary  
62 human cell models.

63

64 This work used human primary cells to examine the role of CPSF6 in HIV-1  
65 replication. Our experiments demonstrated that the HIV-1 capsid mutations N74D or

66 A77V affected the capsid's ability to interact with CPSF6, as displayed by infectivity  
67 phenotypes in human primary peripheral blood mononuclear cells (PBMCs) and CD4<sup>+</sup> T  
68 cells. When compared with the wild-type virus, HIV-1-N74D demonstrated decreased  
69 infectivity, but HIV-1-A77V infectivity was less affected.

70         These different mutant virus infectivity phenotypes suggested that the reduced  
71 primary cell infectivity observed in the case of HIV-1-N74D was not likely to be due to a  
72 CPSF6-binding defect. To test this hypothesis directly, we challenged CPSF6-depleted  
73 human primary CD4<sup>+</sup> T cells with HIV-1-N74D and HIV-1-A77V. Remarkably, the  
74 reduced HIV-1-N74D infectivity in human primary cells did not change with depleted  
75 CPSF6 expression, suggesting that the loss of capsid-CPSF6 interactions did not  
76 account for the decreased infectivity of this mutant virus. One possibility is that a  
77 different protein may be responsible for reduced HIV-1-N74D infectivity. Recently, we  
78 and others have demonstrated that cyclophilin A (Cyp A) protects the HIV-1 core from  
79 restriction by the human tripartite motif-containing protein 5 $\alpha$  (TRIM5 $\alpha_{hu}$ ) in primary  
80 CD4<sup>+</sup> T cells. To test whether TRIM5 $\alpha_{hu}$  is involved in decreased HIV-1-N74D infectivity,  
81 we challenged TRIM5 $\alpha_{hu}$ -depleted human primary CD4<sup>+</sup> T cells with HIV-1-N74D.  
82 Interestingly, we observed that TRIM5 $\alpha_{hu}$  depletion rescued HIV-1-N74D infectivity,  
83 suggesting that TRIM5 $\alpha_{hu}$  is responsible for the restriction observed in human primary T  
84 cells. Because Cyp A protects the core from restriction by TRIM5 $\alpha_{hu}$ , we also tested the  
85 ability of the N74D mutation-containing capsids to bind to Cyp A. We found that these  
86 capsids lost their ability to interact with Cyp A, which may explain the reason that HIV-1-  
87 N74D is restricted by TRIM5 $\alpha_{hu}$ . Overall, our results show that the HIV-1-N74D mutant  
88 virus is restricted by TRIM5 $\alpha_{hu}$  due to an inability to bind Cyp A.

89

## 90 **RESULTS**

91 **HIV-1-N74D exhibits defective infectivity of primary CD4<sup>+</sup> T cells.** To test the role of  
92 capsid-CPSF6 interactions during the infection process, we challenged dog and human  
93 cell lines with HIV-1 viruses containing the capsid mutations N74D and A77V (both of  
94 which prevent capsid interactions with CPSF6). Infectivity of wild-type and mutant HIV-  
95 1<sub>NL4-3</sub>Δenv, pseudotyped with vesicular stomatitis virus G (VSV-G) envelopes  
96 expressing green fluorescent protein (GFP) as an infection reporter, were normalized  
97 using p24 levels. HIV-1-N74D-GFP viruses showed a defect on infectivity when  
98 compared to wild type viruses when infecting the lung human cell line A549 or the  
99 Jurkat T cell line (Figure 1). HIV-1-A77V-GFP viruses showed a lesser defect when  
100 compared to HIV-1-N74D-GFP viruses. By contrast, the infectivity defect of HIV-1-  
101 N74D-GFP viruses was not observed in the canine cell Cf2Th, which do not express a  
102 TRIM5 $\alpha$  orthologues (Figure 1).

103         Next we tested whether these infectivity defects are present in human primary  
104 cells. As shown in Figure 2A, HIV-1-N74D-GFP showed a defect in PBMC infections  
105 compared with wild-type HIV-1 in at least 3 donors. However, HIV-1-A77V-GFP  
106 exhibited a minor infectivity defect when compared with HIV-1-N74D-GFP viruses.  
107 Similar results were observed when we challenged human primary CD4<sup>+</sup> T cells  
108 obtained from three independent donors with HIV-1-N74D-GFP and HIV-1-A77V-GFP  
109 (Figure 2B). As both N74D and A77V capsid mutants lost their ability to bind to CPSF6  
110 (data not shown), the results suggested that the decreased infectivity of HIV-1-N74D-

111 GFP in primary CD4<sup>+</sup> T cells is likely due to reasons other than loss of binding to  
112 CPSF6.

113

114 **Depletion of CPSF6 in human primary CD4<sup>+</sup> T cells does not affect HIV-1**

115 **infectivity.** To test the role of CPSF6 in HIV-1 infection of human primary cells, we  
116 challenged CPSF6-depleted CD4<sup>+</sup> T cells with wild-type and mutant HIV-1. As shown in  
117 Figure 3A, CRISPR-Cas9 ribonucleoprotein complexes (crRNPs) containing the anti-  
118 CPSF6 guide RNA (gRNA) #5 and #6 completely depleted the expression of CPSF6 in  
119 human primary CD4<sup>+</sup> T cells. As a control, we also knocked out the expression of  
120 CXCR4. Similar to the results above, CPSF6 depletion did not affect wild-type HIV-1  
121 infectivity in human primary cells (Figure 3B). In addition, depletion of CPSF6 did not  
122 affect the infectivity of either HIV-1-N74D-GFP or HIV-1-A77V-GFP. These experiments  
123 demonstrated that depletion of CPSF6 in human primary cells did not affect HIV-1  
124 infectivity, suggesting that the reduced infectivity of HIV-1-N74D was not due to blocked  
125 virus interactions with CPSF6.

126

127 **Depletion of TRIM5<sub>α<sub>hu</sub></sub> in human primary CD4<sup>+</sup> T cells rescues HIV-1-N74D**

128 **infectivity.** We and others have previously demonstrated that Cyp A protects the HIV-1  
129 core from TRIM5<sub>α<sub>hu</sub></sub> restriction in human primary CD4<sup>+</sup> T cells [11, 12]. Therefore, we  
130 hypothesized that TRIM5<sub>α<sub>hu</sub></sub> may decrease the infectivity of HIV-1-N74D in human  
131 primary cells. To test this hypothesis, we challenged TRIM5<sub>α<sub>hu</sub></sub>-depleted human primary  
132 CD4<sup>+</sup> T cells with HIV-1-N74D-GFP. crRNPs containing the anti-TRIM5<sub>α<sub>hu</sub></sub> gRNA #6  
133 and #7 completely depleted the expression of endogenous TRIM5<sub>α<sub>hu</sub></sub> in human primary

134 CD4<sup>+</sup> T cells (Figure 4A). As shown in Figure 4B, the depletion of TRIM5 $\alpha_{hu}$  rescued  
135 HIV-1-N74D-GFP infectivity in CD4<sup>+</sup> T cells. These results suggested that TRIM5 $\alpha_{hu}$   
136 restricted HIV-1-N74D in human CD4<sup>+</sup> T cells. Interestingly, small infectivity changes  
137 were observed for HIV-1-A77V in TRIM5 $\alpha_{hu}$ -depleted cells, suggesting that this virus is  
138 not restricted by TRIM5 $\alpha_{hu}$ .

139

#### 140 **N74D-stabilized capsids bind to TRIM5 $\alpha_{hu}$ but do not interact with Cyp A.** If

141 TRIM5 $\alpha_{hu}$  restriction occurs after cells are infected by HIV-1-N74D, it implies that Cyp A  
142 is no longer protecting the core. To test this hypothesis, we assessed the abilities of  
143 TRIM5 $\alpha_{hu}$  and Cyp A to bind to N74D-stabilized capsid tubes using a capsid binding  
144 assay [13]. As shown in Figure 5, TRIM5 $\alpha_{hu}$  bound with increased affinity to stabilized  
145 N74D capsid tubes than to wild-type tubes. Interestingly, TRIM5 $\alpha_{hu}$  bound to A77V-  
146 stabilized tubes and wild-type tubes in a similar manner. Results from these ancillary  
147 experiments support the idea that the infectivity defect observed for HIV-1-N74D is due  
148 to an increase in TRIM5 $\alpha_{hu}$  binding to N74D capsids compared with that to wild-type  
149 capsids. We have previously shown that when Cyp A was not expressed in primary  
150 CD4<sup>+</sup> T cells, TRIM5 $\alpha_{hu}$  binding to capsid increased [11]; therefore, we tested the ability  
151 of Cyp A to bind to N74D-stabilized capsid tubes. As shown in Figure 5, Cyp A did not  
152 bind to N74D-stabilized capsid tubes, although it bound to wild-type capsid tubes.  
153 These results showed that N74D capsids were not protected by Cyp A, leading to  
154 TRIM5 $\alpha_{hu}$  binding and restriction. Interestingly, Cyp A did not bind to A77V-stabilized  
155 tubes.

156

157

158

## 159 **DISCUSSION**

160           Here we have shown that the infectivity defect observed for HIV-1-N74D viruses  
161 in CD4<sup>+</sup> T cells is due to its inability to interact with Cyp A, which exposes the viral core  
162 to TRIM5 $\alpha_{\text{hu}}$  binding and restriction. These results concur with the idea that Cyp A plays  
163 an important role in the protection of the HIV-1 core in the early stages of infection [11,  
164 12], and indicate once again that Cyp A may be essential in the early stages of HIV-1  
165 infection to ensure protection of the core from restriction factors or cellular conditions  
166 that may affect infection. These results are in contrast to the current notion that the  
167 infectivity defect of N74D is due to its loss of CPSF6 binding. Although capsids bearing  
168 the N74D change do not interact with CPSF6, the infectivity defect that HIV-1-N74D  
169 viruses exhibit is due to a decrease in Cyp A binding with a concomitant gain of  
170 TRIM5 $\alpha_{\text{hu}}$  binding, which restricts infection.

171           While an intact HIV-1 core has more than ~1200 binding sites for Cyp A, the  
172 actual number of sites occupied by Cyp A during an infection is not known; however, it  
173 is reasonable to think that binding of one or two Cyp A molecules per hexamer would be  
174 sufficient to prevent the binding of restriction factors such as TRIM5 $\alpha_{\text{hu}}$  by steric  
175 hindrance. So theoretically, only two Cyp A molecules per hexamer would be needed to  
176 ensure that infection is productive. Interestingly, residue N74 in the capsid structure is  
177 distantly located from the Cyp A binding loop, suggesting that an overall structural shift  
178 may be occurring in order to prevent Cyp A binding. An alternative explanation is that  
179 the N74D mutation may affect core breathing, and consequently, inhibit the binding of



180 Cyp A to the core [14]. One of the implications of this study is that interactions between  
181 Cyp A and capsid mutants should be considered when trying to understand HIV-1  
182 infectivity defects involving human primary cells.

183         The infectivity defect of HIV-1-A77V viruses was not very pronounced when  
184 compared to HIV-1-N74D viruses. In addition, depletion of TRIM5 $\alpha_{\text{hu}}$  did not rescue the  
185 infectivity defect of HIV-1-A77V. In agreement, A77V stabilized capsid tubes did not  
186 showed an increase in binding to TRIM5 $\alpha_{\text{hu}}$ , but lost binding to Cyp A. One possibility is  
187 that HIV-1-A77V viruses are defective for a different reason, which agrees with the  
188 experiments showing that HIV-1-A77V viruses can replicate in CD4<sup>+</sup> T cells when  
189 compared to HIV-1-N74D [15].

190         While this work was ongoing, TRIM34 has also been shown to be important for  
191 decreased HIV-1-N74D infectivity in primary CD4<sup>+</sup> T cells [16]. Taken together, these  
192 results suggest that TRIM5 $\alpha_{\text{hu}}$  may be working together with TRIM34 to reduce HIV-1-  
193 N74D infectivity. We demonstrated previously that TRIM5 $\alpha$  proteins can form higher-  
194 order, self-associating complexes which are essential for TRIM5 $\alpha$ -based restriction of  
195 retroviruses [17, 18]. In addition, these studies showed that TRIM5 $\alpha$  proteins can also  
196 form higher-order complexes with TRIM orthologs such as TRIM34 and TRIM6 [19]. It is  
197 possible that TRIM5 $\alpha_{\text{hu}}$  forms higher-order complexes with TRIM34 in order to bind and  
198 restrict HIV-1-N74D viruses, as we have previously suggested [20].

199         These results highlight the importance of HIV-1 core-Cyp A interactions during  
200 productive HIV-1 infection and indicate that Cyp A is an essential cofactor for HIV-1  
201 replication in human primary CD4<sup>+</sup> T cells.

202

203

## 204 **MATERIALS AND METHODS**

### 205 **Infection using HIV-1-GFP reporter viruses**

206           Recombinant HIV-1 strains (e.g., HIV-1-N74D and HIV-1-A77V) expressing GFP,  
207 and pseudotyped with VSV-G, were prepared as previously described [21]. All viruses  
208 were titered according to p24 levels and infectivity. Viral challenges were performed in  
209 24-well plates by infecting 50,000 cells (PBMCs or CD4<sup>+</sup> T cells) per well. Infectivity was  
210 determined by measuring the percentage of GFP-positive cells using flow cytometry  
211 (BD FACSCelesta, San Jose, CA, USA).

212

### 213 **Capsid expression and purification**

214           The pET-11a vector was used to express HIV-1 capsid proteins containing the  
215 A14C and E45C mutations. Point mutations N74D and A77V were introduced using the  
216 QuikChange II site-directed mutagenesis kit (Stratagene) according to the  
217 manufacturer's instructions. All proteins were expressed in *Escherichia coli* one-shot  
218 BL21star (DE3) cells (Invitrogen, Carlsbad, CA, USA), as previously described [13].  
219 Briefly, cells were inoculated in Luria-Bertani medium and cultured at 30°C until mid-log  
220 phase (Absorbance at 600 nm, 0.6–0.8). Protein expression was induced with 1 mM  
221 isopropyl-β-d-thiogalactopyranoside overnight at 18°C. Cells were harvested by  
222 centrifugation at 5,000 × g for 10 min at 4°C, and pellets were stored at –80°C until  
223 purification. Purification of capsids was carried out as follows. Pellets from two-liter  
224 cultures were lysed by sonication (Qsonica microtip: 4420; A = 45; 2 min; 2 sec on; 2  
225 sec off for 12 cycles), in 40 ml of lysis buffer (50 mM Tris pH = 8, 50 mM NaCl, 100 mM

226  $\beta$ -mercaptoethanol, and Complete ethylenediaminetetraacetic acid (EDTA)-free  
227 protease inhibitor tablets). Cell debris was removed by centrifugation at 40,000  $\times$  g for  
228 20 min at 4°C. Proteins from the supernatant were precipitated by incubation with one-  
229 third the volume of saturated ammonium sulfate containing 100 mM  $\beta$ -mercaptoethanol  
230 for 20 min at 4°C, and centrifugation at 8,000  $\times$  g for 20 min at 4°C. Precipitated  
231 proteins were resuspended in 30 ml of buffer A (25 mM 2-(N-morpholino) ethanesulfonic  
232 acid (MES), pH 6.5, and 100 mM  $\beta$ -mercaptoethanol) and sonicated 2–3 times (Qsonica  
233 microtip: 4420; A = 45; 2 min; 1 sec on; 2 sec off). The protein sample was dialyzed  
234 three times in buffer A (2 h, overnight, and 2 h), sonicated, diluted in 500 ml of buffer A,  
235 and then separated sequentially on a 5-ml HiTrap Q HP column followed by a 5-ml  
236 HiTrap SP FF column (GE Healthcare), which were both pre-equilibrated with buffer A.  
237 Capsid proteins were eluted from the HiTrap SP FF column using a linear gradient of  
238 concentrations ranging from 0–2 M NaCl. The eluted fractions that had the highest  
239 protein levels were selected based on absorbance at 280 nm. Pooled fractions were  
240 dialyzed three times (2 h, overnight, and 2 h) in storage buffer (25 mM MES, 2 M NaCl,  
241 20 mM  $\beta$ -mercaptoethanol). Samples were concentrated to 20 mg/ml using Centriprep  
242 Centrifugal Filter Units and stored at –80°C.

243

#### 244 **Assembly of stabilized HIV-1 capsid tubes**

245 One milliliter of monomeric capsid (5 mg/ml) was dialyzed in SnakeSkin dialysis  
246 tubing (10K MWCO, Thermo Scientific, Waltham, MA, USA) using a buffer that was high  
247 in salt and contained a reducing agent (Buffer 1: 50 mM Tris, pH 8, 1 M NaCl, 100 mM  
248  $\beta$ -mercaptoethanol) at 4°C for 8 h. The protein was then dialyzed using the same buffer

249 without the reducing agent  $\beta$ -mercaptoethanol (Buffer 2: 50 mM Tris, pH 8, 1 M NaCl) at  
250 4°C for 8 h. The absence of  $\beta$ -mercaptoethanol in the second dialysis allowed the  
251 formation of disulfide bonds between Cysteine 14 and the 45 inter-capsid monomers in  
252 the hexamer. Finally, the protein was dialyzed using Buffer 3 (20 mM Tris, pH 8, 40 mM  
253 NaCl) at 4°C for 8 h. Assembled complexes were kept at 4°C for up to 1 month.

254

### 255 **Capsid binding assay protocol**

256 Human HEK293T cells were transfected for 24 h with a plasmid expressing the  
257 protein of interest (TRIM5 $\alpha_{hu}$ ). The culture media was completely removed and cells  
258 were scraped off the plate and lysed in 300  $\mu$ l of capsid binding buffer (CBB: 10 mM  
259 Tris, pH 8, 1.5 mM MgCl<sub>2</sub>, 10 mM KCl). Cells were rotated for 15 min at 4°C and then  
260 centrifuged to remove cellular debris (21,000  $\times$  g, 15 min, 4°C). Cell lysates were  
261 incubated with stabilized HIV-1 capsid tubes for 1 h at 25°C. The stabilized HIV-1  
262 capsid tubes were then centrifuged at 21,000  $\times$  g for 2 min. Pellets were washed 2–3  
263 times by resuspension and centrifugation in CBB or phosphate-buffered saline (PBS).  
264 Pellets were resuspended in 1 $\times$  Laemmli buffer and analyzed by western blotting using  
265 an anti-p24 antibody and other appropriate antibodies.

266

### 267 **Preparation of PBMCs and CD4<sup>+</sup> T cells**

268 PBMCs from healthy-donor whole blood were isolated by density gradient  
269 centrifugation using Ficoll-Paque Plus (GE Health Care, Chicago, IL, USA). Whole  
270 blood (40 ml) was centrifuged at 300  $\times$  g for 10 min, and the plasma layer was removed  
271 and replaced with Hank's Balanced Salt solution (HBSS; Sigma Aldrich, St. Louis, MO,

272 USA). The blood sample was then diluted 1:2 with HBSS, and 20 ml of the diluted  
273 sample was layered on top of 20 ml Ficoll-Paque Plus and centrifuged at  $300 \times g$  for 30  
274 min. The resulting buffy coat layer was collected, washed twice with HBSS, and  
275 resuspended in Roswell Park Memorial Institute (RPMI) medium containing 10%  
276 (vol/vol) fetal bovine serum (FBS) and 1% (vol/vol) penicillin-streptomycin, and activated  
277 with IL-2 (100 U/ml) (Human IL-2; Cell Signaling Technology, #8907SF) and  
278 phytohemagglutinin (1  $\mu\text{g/ml}$ ) for 3 days.  $\text{CD4}^+$  T cells were obtained via negative  
279 selection from PBMCs using a human  $\text{CD4}^+$  T-cell isolation kit (MACS Miltenyi Biotec,  
280 #130-096-533, Bergisch Gladbach, Germany). PBMCs ( $1 \times 10^7$  total cells) were  
281 resuspended in 40  $\mu\text{l}$  of  $\text{CD4}^+$  T-cell isolation buffer (PBS, pH 7.2, 0.5% bovine serum  
282 albumin (BSA), and 2 mM EDTA).  $\text{CD4}^+$  T-cell biotin-antibody cocktail (10  $\mu\text{l}$ ) was then  
283 added to the PBMCs and incubated at  $4^\circ\text{C}$  for 5 min.  $\text{CD4}^+$  T-cell isolation buffer (30  $\mu\text{l}$ )  
284 and  $\text{CD4}^+$  T-cell microbead cocktail (20  $\mu\text{l}$ ) were then added and further incubated for 10  
285 min at  $4^\circ\text{C}$ . Depending on the number of PBMCs isolated, either an LS or MS column  
286 attached to a Magnetic Activated Cell Sorting Separator was prewashed using 3 ml or 6  
287 ml of ice-cold  $\text{CD4}^+$  T-cell isolation buffer, respectively. The PBMC suspension was  
288 added to the column and the flow-through was collected in a 15-ml tube. The LS or MS  
289 column was then washed (3 ml or 6 ml, respectively, with ice-cold  $\text{CD4}^+$  T-cell isolation  
290 buffer), and the flow-through was collected. The newly isolated  $\text{CD4}^+$  T cells were then  
291 centrifuged at  $800 \times g$  for 5 min and resuspended in RPMI medium supplemented with  
292 IL-2 (100 U/ml).

293

294 **CRISPR-Cas9 knockouts in primary  $\text{CD4}^+$  T cells**

295 Detailed protocols for the production of CRISPR-Cas9 ribonucleoprotein  
296 complexes (crRNPs) and primary CD4<sup>+</sup> T-cell editing have been previously published  
297 [22, 23]. Briefly, lyophilized CRISPR RNA (crRNA) and trans-activating crRNA  
298 (tracrRNA; Dharmacon, Lafayette, CO, USA) were each resuspended at a  
299 concentration of 160 μM in 10 mM Tris-HCl (pH 7.4), and 150 mM KCl. Five microliters  
300 of 160 μM crRNA was then mixed with 5 μl of 160 μM tracrRNA and incubated for 30  
301 min at 37°C. The gRNA:tracrRNA complexes were then mixed gently with 10 μl of 40  
302 μM purified Cas9-NLS protein (UC-Berkeley Macrolab) to form crRNPs. Complexes  
303 were aliquoted and frozen in 0.2-ml PCR tubes (USA Scientific, Ocala, FL, USA) at –  
304 80°C until further use. crRNA guide sequences used in this study were a combination of  
305 sequences derived from the Dharmacon predesigned Edit-R library for gene knockouts,  
306 and custom-ordered sequences as indicated.

307 PBMCs were isolated by density gradient centrifugation using Ficoll-Paque Plus  
308 (GE Health Care, #17-1440-02). PBMCs were washed thrice with 1× PBS to remove  
309 platelets and resuspended at a final concentration of 5 × 10<sup>8</sup> cells/ml in 1× PBS, 0.5%  
310 BSA, and 2 mM EDTA. Bulk CD4<sup>+</sup> T cells were subsequently isolated from PBMCs by  
311 magnetic negative selection using an EasySep Human CD4<sup>+</sup> T Cell Isolation Kit  
312 (STEMCELL, per manufacturer's instructions). Isolated CD4<sup>+</sup> T cells were suspended in  
313 complete RPMI medium, consisting of RPMI-1640 (Sigma Aldrich) supplemented with 5  
314 mM 4-(2-hydroxyethyl)-1-piperazineethanesulfonic acid (Corning, Corning, NY, USA),  
315 50 μg/ml penicillin/streptomycin (Corning), 5 mM sodium pyruvate (Corning), and 10%  
316 FBS (Gibco). Media was supplemented with 20 IU/ml IL-2 (Miltenyi) immediately before  
317 use. For activation, bulk CD4<sup>+</sup> T cells were immediately plated on anti-CD3-coated

318 plates [coated for 12 hours at 4°C with 20 µg/ml anti-CD3 antibody (UCHT1, Tonbo  
319 Biosciences)] in the presence of 5 µg/ml soluble anti-CD28 antibody (CD28.2, Tonbo  
320 Biosciences). Cells were stimulated for 72 h at 37°C in a 5%-CO<sub>2</sub> atmosphere prior to  
321 electroporation. After stimulation, cell purity and activation were verified by CD4/CD25  
322 immunostaining and flow cytometry as previously described [22].

323         After three days of stimulation, cells were resuspended and counted. Each  
324 electroporation reaction consisted of between  $5 \times 10^5$  and  $1 \times 10^6$  T cells, 3.5 µl RNPs,  
325 and 20 µl of electroporation buffer. crRNPs were thawed to room temperature.  
326 Immediately prior to electroporation, cells were centrifuged at 400 × g for 5 minutes, the  
327 supernatant was removed by aspiration, and the pellet was resuspended in 20 µl of  
328 room temperature P3 electroporation buffer (Lonza, Basel, Switzerland) per reaction.  
329 Cell suspensions (20 µl) were then gently mixed with each RNP and aliquoted into a 96-  
330 well electroporation cuvette for nucleofection with the 4D 96-well shuttle unit (Lonza)  
331 using pulse code EH-115. Immediately after electroporation, 100 µl of prewarmed media  
332 without IL-2 was added to each well and cells were allowed to rest for 30 min in a cell-  
333 culture incubator at 37°C. Cells were subsequently moved to 96-well flat-bottomed  
334 culture plates prefilled with 100 µl warm complete media with IL-2 at 40 U/ml (for a final  
335 concentration of 20 U/ml) and anti-CD3/anti-CD2/anti-CD28 beads (T cell Activation and  
336 Stimulation Kit, Miltenyi) at a 1:1 bead:cell ratio. Cells were cultured at 37°C in a 5%-  
337 CO<sub>2</sub> atmosphere, dark, humidified cell-culture incubator for four days to allow for gene  
338 knockout and protein clearance, with additional media added on day 2. To check  
339 knockout efficiency, 50 µl of mixed culture was transferred to a centrifuge tube. Cells  
340 were pelleted, the supernatant removed, and the pellets were resuspended in 100 µl

341 2.5× Laemmli Sample Buffer. Protein lysates were heated to 98°C for 20 min before  
342 storage at –20°C until assessment by western blotting.

343 RNA guides:

| Synthetic RNA / Gene Target           | Guide # | Sequence             | Catalog Number (Dharmacon) |
|---------------------------------------|---------|----------------------|----------------------------|
| Edit-R Synthetic tracrRNA             | n/a     | n/a                  | U-002005-50                |
| Edit-R crRNA Non-targeting Control #3 | 3       | n/a                  | U-007503-20                |
| CXCR4 crRNA                           | 1       | GAAGCGTGATGACAAAGAGG | Custom sequence            |
| CPSF6 crRNA                           | 5       | GGACCACATAGACATTTACG | CM-012334-05               |
| CPSF6 crRNA                           | 6       | ATATATTGGAAATCTAACAT | Custom sequence            |
| TRIM5alpha crRNA                      | 6       | AAGAAGTCCATGCTAGACAA | Custom sequence            |
| TRIM5alpha crRNA                      | 7       | GTTGATCATTGTGCACGCCA | Custom sequence            |

344

## 345

### 346 **QUANTIFICATION AND STATISTICAL ANALYSES**

347 Statistical analyses were performed using unpaired t-tests. Sample numbers,  
348 number of replicates, and *p* values are indicated in corresponding figure legends.

349 Quantification of western blot band intensities was performed using ImageJ. For all  
350 experiments, means and standard deviations were calculated using GraphPad Prism  
351 7.0c.

352

353

### 354 **ACKNOWLEDGEMENTS**

355 We thank the NIH AIDS repository for reagents. A.S. and F.D.-G. are supported by an  
356 AI087390 grant to F.D.-G.

357

358



## 359 REFERENCES

- 360 1. Lee K, Ambrose Z, Martin TD, Oztop I, Mulky A, Julias JG, et al. Flexible use of nuclear  
361 import pathways by HIV-1. *Cell Host Microbe*. 2010;7(3):221-33. Epub 2010/03/17. doi:  
362 10.1016/j.chom.2010.02.007. PubMed PMID: 20227665; PubMed Central PMCID:  
363 PMCPMC2841689.
- 364 2. Fricke T, Valle-Casuso JC, White TE, Brandariz-Nunez A, Bosche WJ, Reszka N, et al. The  
365 ability of TNPO3-depleted cells to inhibit HIV-1 infection requires CPSF6. *Retrovirology*.  
366 2013;10:46. Epub 2013/04/30. doi: 10.1186/1742-4690-10-46. PubMed PMID: 23622145;  
367 PubMed Central PMCID: PMCPMC3695788.
- 368 3. De Iaco A, Santoni F, Vannier A, Guipponi M, Antonarakis S, Luban J. TNPO3 protects  
369 HIV-1 replication from CPSF6-mediated capsid stabilization in the host cell cytoplasm.  
370 *Retrovirology*. 2013;10:20. Epub 2013/02/19. doi: 10.1186/1742-4690-10-20. PubMed PMID:  
371 23414560; PubMed Central PMCID: PMCPMC3599327.
- 372 4. Bhattacharya A, Alam SL, Fricke T, Zadrozny K, Sedzicki J, Taylor AB, et al. Structural basis  
373 of HIV-1 capsid recognition by PF74 and CPSF6. *Proc Natl Acad Sci U S A*. 2014;111(52):18625-  
374 30. Epub 2014/12/19. doi: 10.1073/pnas.1419945112. PubMed PMID: 25518861; PubMed  
375 Central PMCID: PMCPMC4284599.
- 376 5. Buffone C, Martinez-Lopez A, Fricke T, Opp S, Severgnini M, Cifola I, et al. Nup153  
377 Unlocks the Nuclear Pore Complex for HIV-1 Nuclear Translocation in Nondividing Cells. *J Virol*.  
378 2018;92(19). Epub 2018/07/13. doi: 10.1128/JVI.00648-18. PubMed PMID: 29997211; PubMed  
379 Central PMCID: PMCPMC6146805.
- 380 6. Sowd GA, Serrao E, Wang H, Wang W, Fadel HJ, Poeschla EM, et al. A critical role for  
381 alternative polyadenylation factor CPSF6 in targeting HIV-1 integration to transcriptionally  
382 active chromatin. *Proc Natl Acad Sci U S A*. 2016;113(8):E1054-63. Epub 2016/02/10. doi:  
383 10.1073/pnas.1524213113. PubMed PMID: 26858452; PubMed Central PMCID:  
384 PMCPMC4776470.
- 385 7. Rasheedi S, Shun MC, Serrao E, Sowd GA, Qian J, Hao C, et al. The Cleavage and  
386 Polyadenylation Specificity Factor 6 (CPSF6) Subunit of the Capsid-recruited Pre-messenger RNA  
387 Cleavage Factor I (CFIm) Complex Mediates HIV-1 Integration into Genes. *J Biol Chem*.  
388 2016;291(22):11809-19. Epub 2016/03/20. doi: 10.1074/jbc.M116.721647. PubMed PMID:  
389 26994143; PubMed Central PMCID: PMCPMC4882448.
- 390 8. Chin CR, Perreira JM, Savidis G, Portmann JM, Aker AM, Feeley EM, et al. Direct  
391 Visualization of HIV-1 Replication Intermediates Shows that Capsid and CPSF6 Modulate HIV-1  
392 Intra-nuclear Invasion and Integration. *Cell Rep*. 2015;13(8):1717-31. Epub 2015/11/21. doi:  
393 10.1016/j.celrep.2015.10.036. PubMed PMID: 26586435; PubMed Central PMCID:  
394 PMCPMC5026322.

- 395 9. Zila V, Muller TG, Laketa V, Muller B, Krausslich HG. Analysis of CA Content and CPSF6  
396 Dependence of Early HIV-1 Replication Complexes in SupT1-R5 Cells. *mBio*. 2019;10(6). Epub  
397 2019/11/07. doi: 10.1128/mBio.02501-19. PubMed PMID: 31690677; PubMed Central PMCID:  
398 PMCPMC6831778.
- 399 10. Bejarano DA, Peng K, Laketa V, Borner K, Jost KL, Lucic B, et al. HIV-1 nuclear import in  
400 macrophages is regulated by CPSF6-capsid interactions at the nuclear pore complex. *Elife*.  
401 2019;8. Epub 2019/01/24. doi: 10.7554/eLife.41800. PubMed PMID: 30672737; PubMed  
402 Central PMCID: PMCPMC6400501.
- 403 11. Selyutina A, Persaud M, Simons LM, Bulnes-Ramos A, Buffone C, Martinez-Lopez A, et al.  
404 Cyclophilin A Prevents HIV-1 Restriction in Lymphocytes by Blocking Human TRIM5alpha  
405 Binding to the Viral Core. *Cell Rep*. 2020;30(11):3766-77 e6. Epub 2020/03/19. doi:  
406 10.1016/j.celrep.2020.02.100. PubMed PMID: 32187548; PubMed Central PMCID:  
407 PMCPMC7363000.
- 408 12. Kim K, Dauphin A, Komurlu S, McCauley SM, Yurkovetskiy L, Carbone C, et al. Cyclophilin  
409 A protects HIV-1 from restriction by human TRIM5alpha. *Nat Microbiol*. 2019;4(12):2044-51.  
410 Epub 2019/10/23. doi: 10.1038/s41564-019-0592-5. PubMed PMID: 31636416; PubMed  
411 Central PMCID: PMCPMC6879858.
- 412 13. Selyutina A, Bulnes-Ramos A, Diaz-Griffero F. Binding of host factors to stabilized HIV-1  
413 capsid tubes. *Virology*. 2018;523:1-5. Epub 2018/07/30. doi: 10.1016/j.virol.2018.07.019.  
414 PubMed PMID: 30056211; PubMed Central PMCID: PMCPMC6135678.
- 415 14. Gres AT, Kirby KA, KewalRamani VN, Tanner JJ, Pornillos O, Sarafianos SG. STRUCTURAL  
416 VIROLOGY. X-ray crystal structures of native HIV-1 capsid protein reveal conformational  
417 variability. *Science*. 2015;349(6243):99-103. Epub 2015/06/06. doi: 10.1126/science.aaa5936.  
418 PubMed PMID: 26044298; PubMed Central PMCID: PMCPMC4584149.
- 419 15. Saito A, Henning MS, Serrao E, Dubose BN, Teng S, Huang J, et al. Capsid-CPSF6  
420 Interaction Is Dispensable for HIV-1 Replication in Primary Cells but Is Selected during Virus  
421 Passage In Vivo. *J Virol*. 2016;90(15):6918-35. Epub 2016/06/17. doi: 10.1128/JVI.00019-16.  
422 PubMed PMID: 27307565; PubMed Central PMCID: PMCPMC4944271.
- 423 16. Ohainle M, Kim K, Komurlu Keceli S, Felton A, Campbell E, Luban J, et al. TRIM34  
424 restricts HIV-1 and SIV capsids in a TRIM5alpha-dependent manner. *PLoS Pathog*.  
425 2020;16(4):e1008507. Epub 2020/04/14. doi: 10.1371/journal.ppat.1008507. PubMed PMID:  
426 32282853; PubMed Central PMCID: PMCPMC7179944.
- 427 17. Diaz-Griffero F, Qin XR, Hayashi F, Kigawa T, Finzi A, Sarnak Z, et al. A B-box 2 surface  
428 patch important for TRIM5alpha self-association, capsid binding avidity, and retrovirus  
429 restriction. *J Virol*. 2009;83(20):10737-51. Epub 2009/08/07. doi: 10.1128/JVI.01307-09.  
430 PubMed PMID: 19656869; PubMed Central PMCID: PMCPMC2753111.

- 431 18. Ganser-Pornillos BK, Chandrasekaran V, Pornillos O, Sodroski JG, Sundquist WI, Yeager  
432 M. Hexagonal assembly of a restricting TRIM5alpha protein. *Proc Natl Acad Sci U S A*.  
433 2011;108(2):534-9. Epub 2010/12/29. doi: 10.1073/pnas.1013426108. PubMed PMID:  
434 21187419; PubMed Central PMCID: PMC3021009.
- 435 19. Li X, Yeung DF, Fiegen AM, Sodroski J. Determinants of the higher order association of  
436 the restriction factor TRIM5alpha and other tripartite motif (TRIM) proteins. *J Biol Chem*.  
437 2011;286(32):27959-70. Epub 2011/06/18. doi: 10.1074/jbc.M111.260406. PubMed PMID:  
438 21680743; PubMed Central PMCID: PMC3151041.
- 439 20. Diaz-Griffero F. Caging the beast: TRIM5alpha binding to the HIV-1 core. *Viruses*.  
440 2011;3(5):423-8. Epub 2011/10/14. doi: 10.3390/v3050423. PubMed PMID: 21994740; PubMed  
441 Central PMCID: PMC3186010.
- 442 21. Diaz-Griffero F, Perron M, McGee-Estrada K, Hanna R, Maillard PV, Trono D, et al. A  
443 human TRIM5alpha B30.2/SPRY domain mutant gains the ability to restrict and prematurely  
444 uncoat B-tropic murine leukemia virus. *Virology*. 2008;378(2):233-42. Epub 2008/07/01. doi:  
445 S0042-6822(08)00310-3 [pii]  
446 10.1016/j.virol.2008.05.008. PubMed PMID: 18586294; PubMed Central PMCID: PMC2597210.
- 447 22. Hultquist JF, Schumann K, Woo JM, Manganaro L, McGregor MJ, Doudna J, et al. A Cas9  
448 Ribonucleoprotein Platform for Functional Genetic Studies of HIV-Host Interactions in Primary  
449 Human T Cells. *Cell Rep*. 2016;17(5):1438-52. Epub 2016/10/27. doi:  
450 10.1016/j.celrep.2016.09.080. PubMed PMID: 27783955; PubMed Central PMCID:  
451 PMC35123761.
- 452 23. Hultquist JF, Hiatt J, Schumann K, McGregor MJ, Roth TL, Haas P, et al. CRISPR-Cas9  
453 genome engineering of primary CD4(+) T cells for the interrogation of HIV-host factor  
454 interactions. *Nat Protoc*. 2019;14(1):1-27. Epub 2018/12/19. doi: 10.1038/s41596-018-0069-7.  
455 PubMed PMID: 30559373; PubMed Central PMCID: PMC6637941.  
456  
457

458 **FIGURE LEGENDS**

459

460 **Figure 1. HIV-1-N74D exhibits an infectivity defect in human cell lines but not in**  
461 **dog cell lines.** Human lung A549 cells, human Jurkat T cells, or dog thymus Cf2Th  
462 cells were challenged with increasing amounts of the indicated p24-normalized WT and  
463 mutant HIV-1 viruses. Infectivity was determined at 48 h post-challenge by measuring  
464 the percentage of GFP-positive cells. Experiments were repeated three times and a  
465 representative experiment is shown.

466

467 **Figure 2. HIV-1-N74D exhibits an infectivity defect in primary PBMCs and CD4<sup>+</sup> T**  
468 **cells.** Human primary PBMCs **(A)** or purified CD4<sup>+</sup> T cells **(B)** from healthy donors were  
469 challenged with increasing amounts of p24-normalized HIV-1-GFP, HIV-1-N74D-GFP,  
470 or HIV-1-A77V-GFP. Infectivity was determined at 72 h post-challenge by measuring  
471 the percentage of GFP-positive cells. Experiments were repeated three times per donor,  
472 and a representative experimental result is shown. Statistical analysis was performed  
473 using an intermediate value taken from the infection curves (right panel). \*\* indicates P-  
474 value < 0.001, \*\*\* indicates P-value < 0.0005, \*\*\*\* indicates P-value < 0.0001 as  
475 determined by using the unpaired t-test.

476

477

478 **Figure 3. Depleted CPSF6 expression in human primary CD4<sup>+</sup> T cells does not**  
479 **affect HIV-1 infectivity. (A)** Human primary CD4<sup>+</sup> T cells from two different donors had  
480 CPSF6 expression knocked out using the CRISPR/Cas9 system, as described in

481 Methods. Briefly, CD4<sup>+</sup> T cells were electroporated using two different guide RNAs  
482 (gRNAs) against CPSF6 (gRNA #5 and #6) together with the Cas9 protein. At 72 h  
483 post-electroporation, endogenous expression of CPSF6 in CD4<sup>+</sup> T cells was analyzed  
484 by western blotting using an antibody against CPSF6. For controls, a gRNA against  
485 CXCR4 and a non-targeting gRNA were electroporated. Expression of GAPDH was  
486 used as a loading control. Similar results were obtained using two different donors, and  
487 a representative blot is shown. **(B)** Human primary CD4<sup>+</sup> T cells depleted for CPSF6  
488 expression were challenged with increasing amounts of p24-normalized HIV-1-GFP,  
489 HIV-1-N74D-GFP, or HIV-1-A77V-GFP. Infectivity was determined at 72 h post-  
490 challenge by measuring the percentage of GFP-positive cells. Experiments were  
491 repeated three times per donor, and a representative experimental result is shown.  
492 Statistical analysis was performed using an intermediate value taken from the infection  
493 curves (bottom panels). \*\* indicates P-value < 0.001, \*\*\* indicates P-value < 0.0005 as  
494 determined by using the unpaired t-test.

495

496

497 **Figure 4. TRIM5 $\alpha_{\text{hu}}$  depletion in human primary CD4<sup>+</sup> T cells rescues HIV-1-N74D**  
498 **infectivity. (A)** Human primary CD4<sup>+</sup> T cells from three different donors had TRIM5 $\alpha_{\text{hu}}$   
499 expression knocked out using the CRISPR/Cas9 system, as described in Methods.  
500 Briefly, CD4<sup>+</sup> T cells were electroporated using two different guide RNAs (gRNAs)  
501 against TRIM5 $\alpha_{\text{hu}}$  (gRNA #6 and #7) together with the Cas9 protein. At 72 h post-  
502 electroporation, the endogenous expression of TRIM5 $\alpha_{\text{hu}}$  in CD4<sup>+</sup> T cells was analyzed  
503 by western blotting using an antibody against TRIM5 $\alpha_{\text{hu}}$ . For controls, a gRNA against

504 CXCR4, and a non-targeting gRNA were electroporated. Expression of GAPDH was  
505 used as a loading control. Similar results were obtained using two different donors, and  
506 a representative blot is shown. **(B)** Human primary CD4<sup>+</sup> T cells depleted for TRIM5 $\alpha_{hu}$   
507 expression were challenged with increasing amounts of p24-normalized HIV-1-GFP,  
508 HIV-1-N74D-GFP, or HIV-1-A77V-GFP. Infectivity was determined at 72 h post-  
509 challenge by measuring the percentage of GFP-positive cells. Experiments were  
510 repeated three times per donor, and a representative experimental result is shown.  
511 Statistical analysis was performed using an intermediate value taken from the infection  
512 curves (bottom panels). \* indicates P-value < 0.005, \*\* indicates P-value < 0.001, \*\*\*  
513 indicates P-value < 0.0005, NS indicates not significant as determined by using the  
514 unpaired t-test.

515

516

517

518 **Figure 5. N74D-stabilized capsids bind to TRIM5 $\alpha_{hu}$  but do not interact with Cyp**

519 **A.** Human 293T cells were transfected with plasmids expressing TRIM5 $\alpha_{hu}$ -  
520 hemagglutinin (HA). Post-transfection (24 h), cells (INPUT) were lysed in capsid binding  
521 buffer (CBB) as described in Methods. Cell extracts containing TRIM5 $\alpha_{hu}$ -HA were then  
522 mixed with 10  $\mu$ l of either stabilized wild-type, N74D, or A77V capsid tubes (5 mg/ml).  
523 Mixtures were incubated for 1 h at room temperature. Stabilized HIV-1 capsid tubes  
524 were collected by centrifugation and washed twice using CBB. Pellets were  
525 resuspended in 1 $\times$  Laemmli buffer (BOUND). INPUT and BOUND fractions were then  
526 analyzed by western blotting using anti-HA, anti-Cyp A, and anti-p24 antibodies.

527 Experiments were repeated three times, and a representative experimental result is  
528 shown. The BOUND fraction relative to the INPUT fraction for three independent  
529 experiments (with standard deviation) is shown. \* indicates a p-value < 0.005, \*\*\*\*  
530 indicates a p-value < 0.0001, and NS indicates no significant difference as determined  
531 by unpaired t-tests.  
532

bioRxiv preprint doi: <https://doi.org/10.1101/2020.09.29.318121>; this version posted September 29, 2020. The copyright holder for this preprint (which was not certified by peer review) is the author/funder, who has granted bioRxiv a license to display the preprint in perpetuity. It is made available under aCC-BY 4.0 International license.

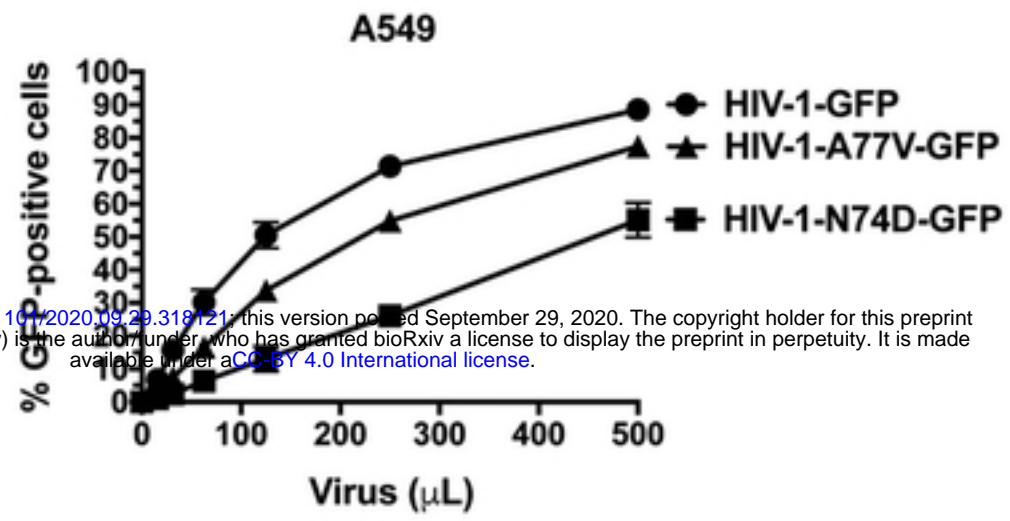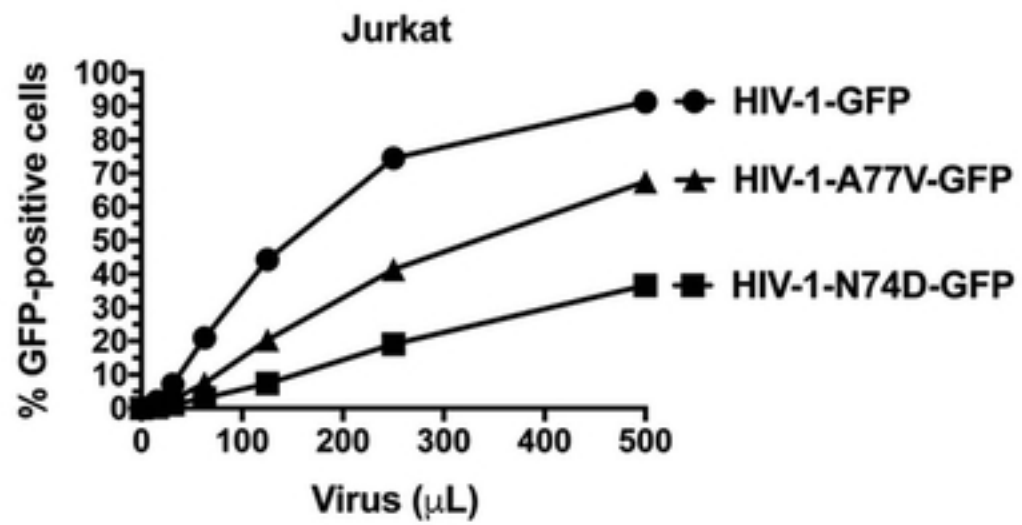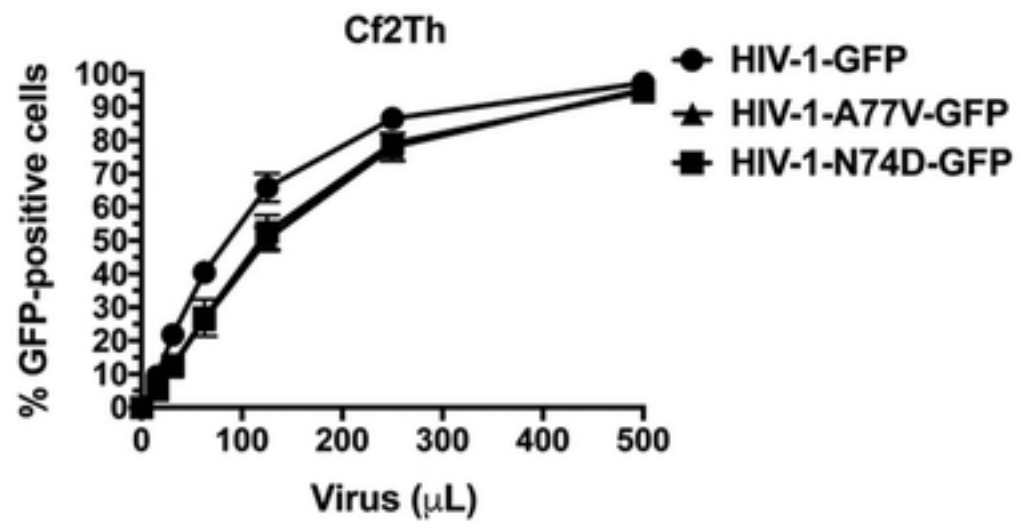

**Figure 1**



# A PBMCs

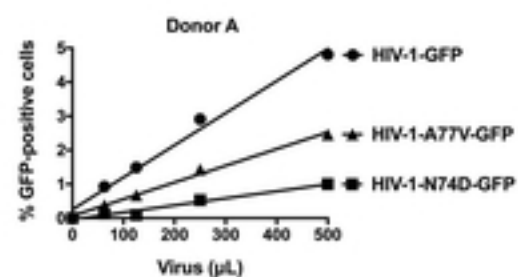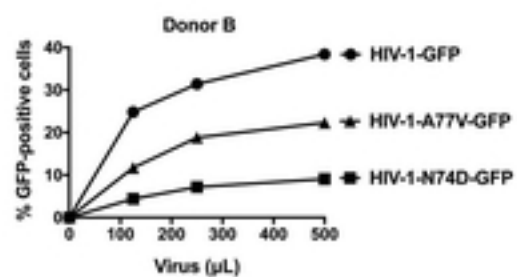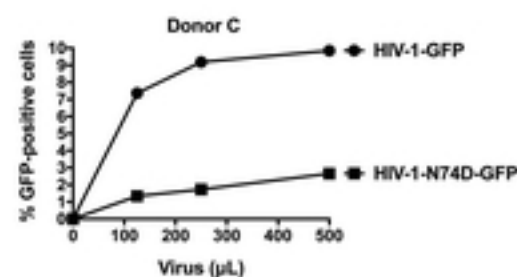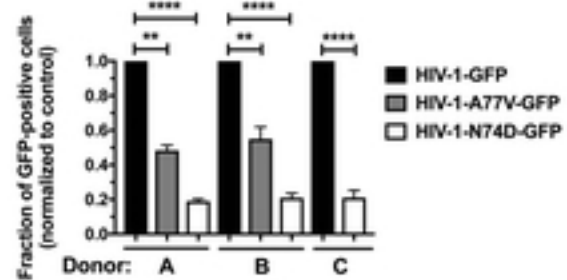

# B CD4<sup>+</sup> T cells

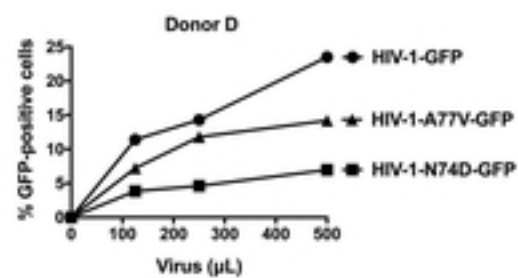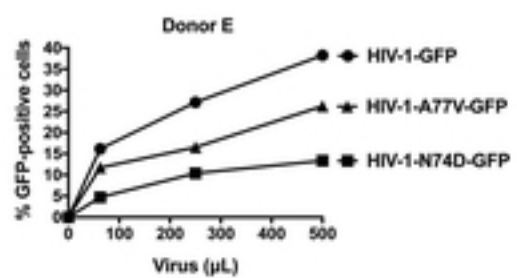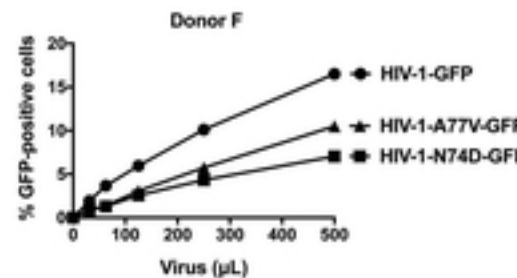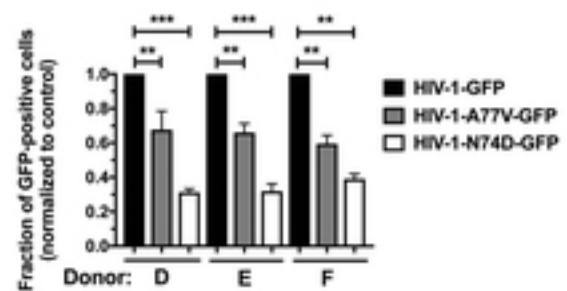

Figure 2

Figure 2

**A**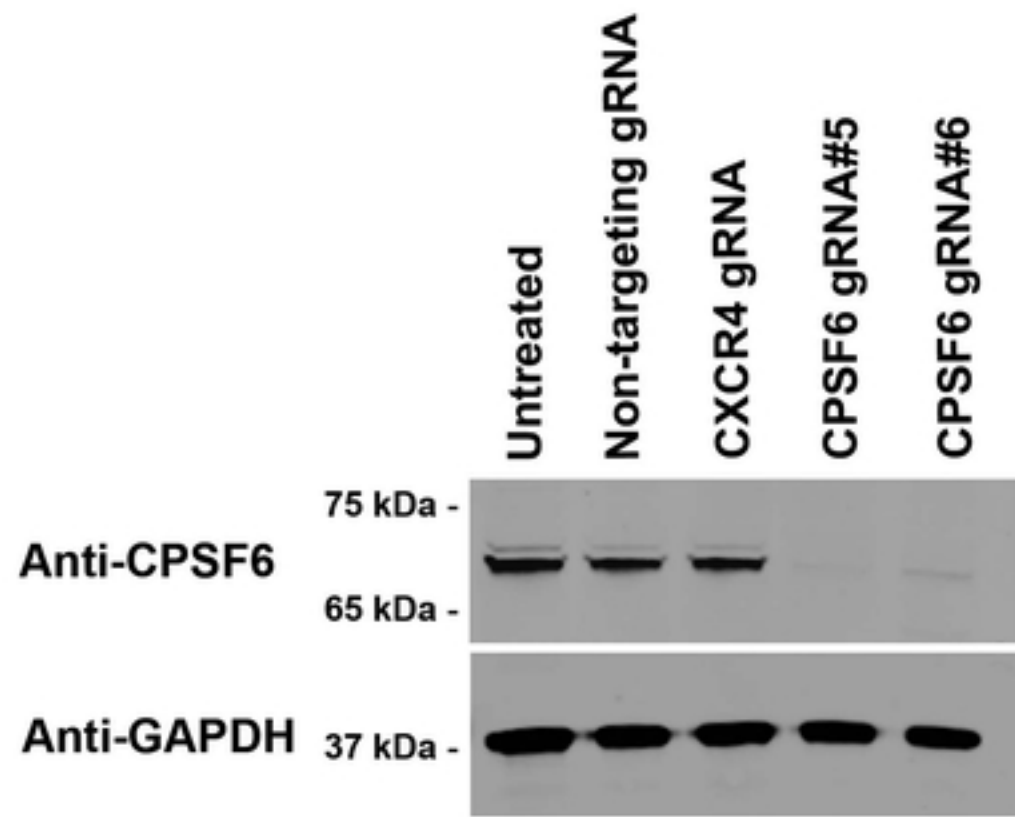**Figure 3**

Figure 3A

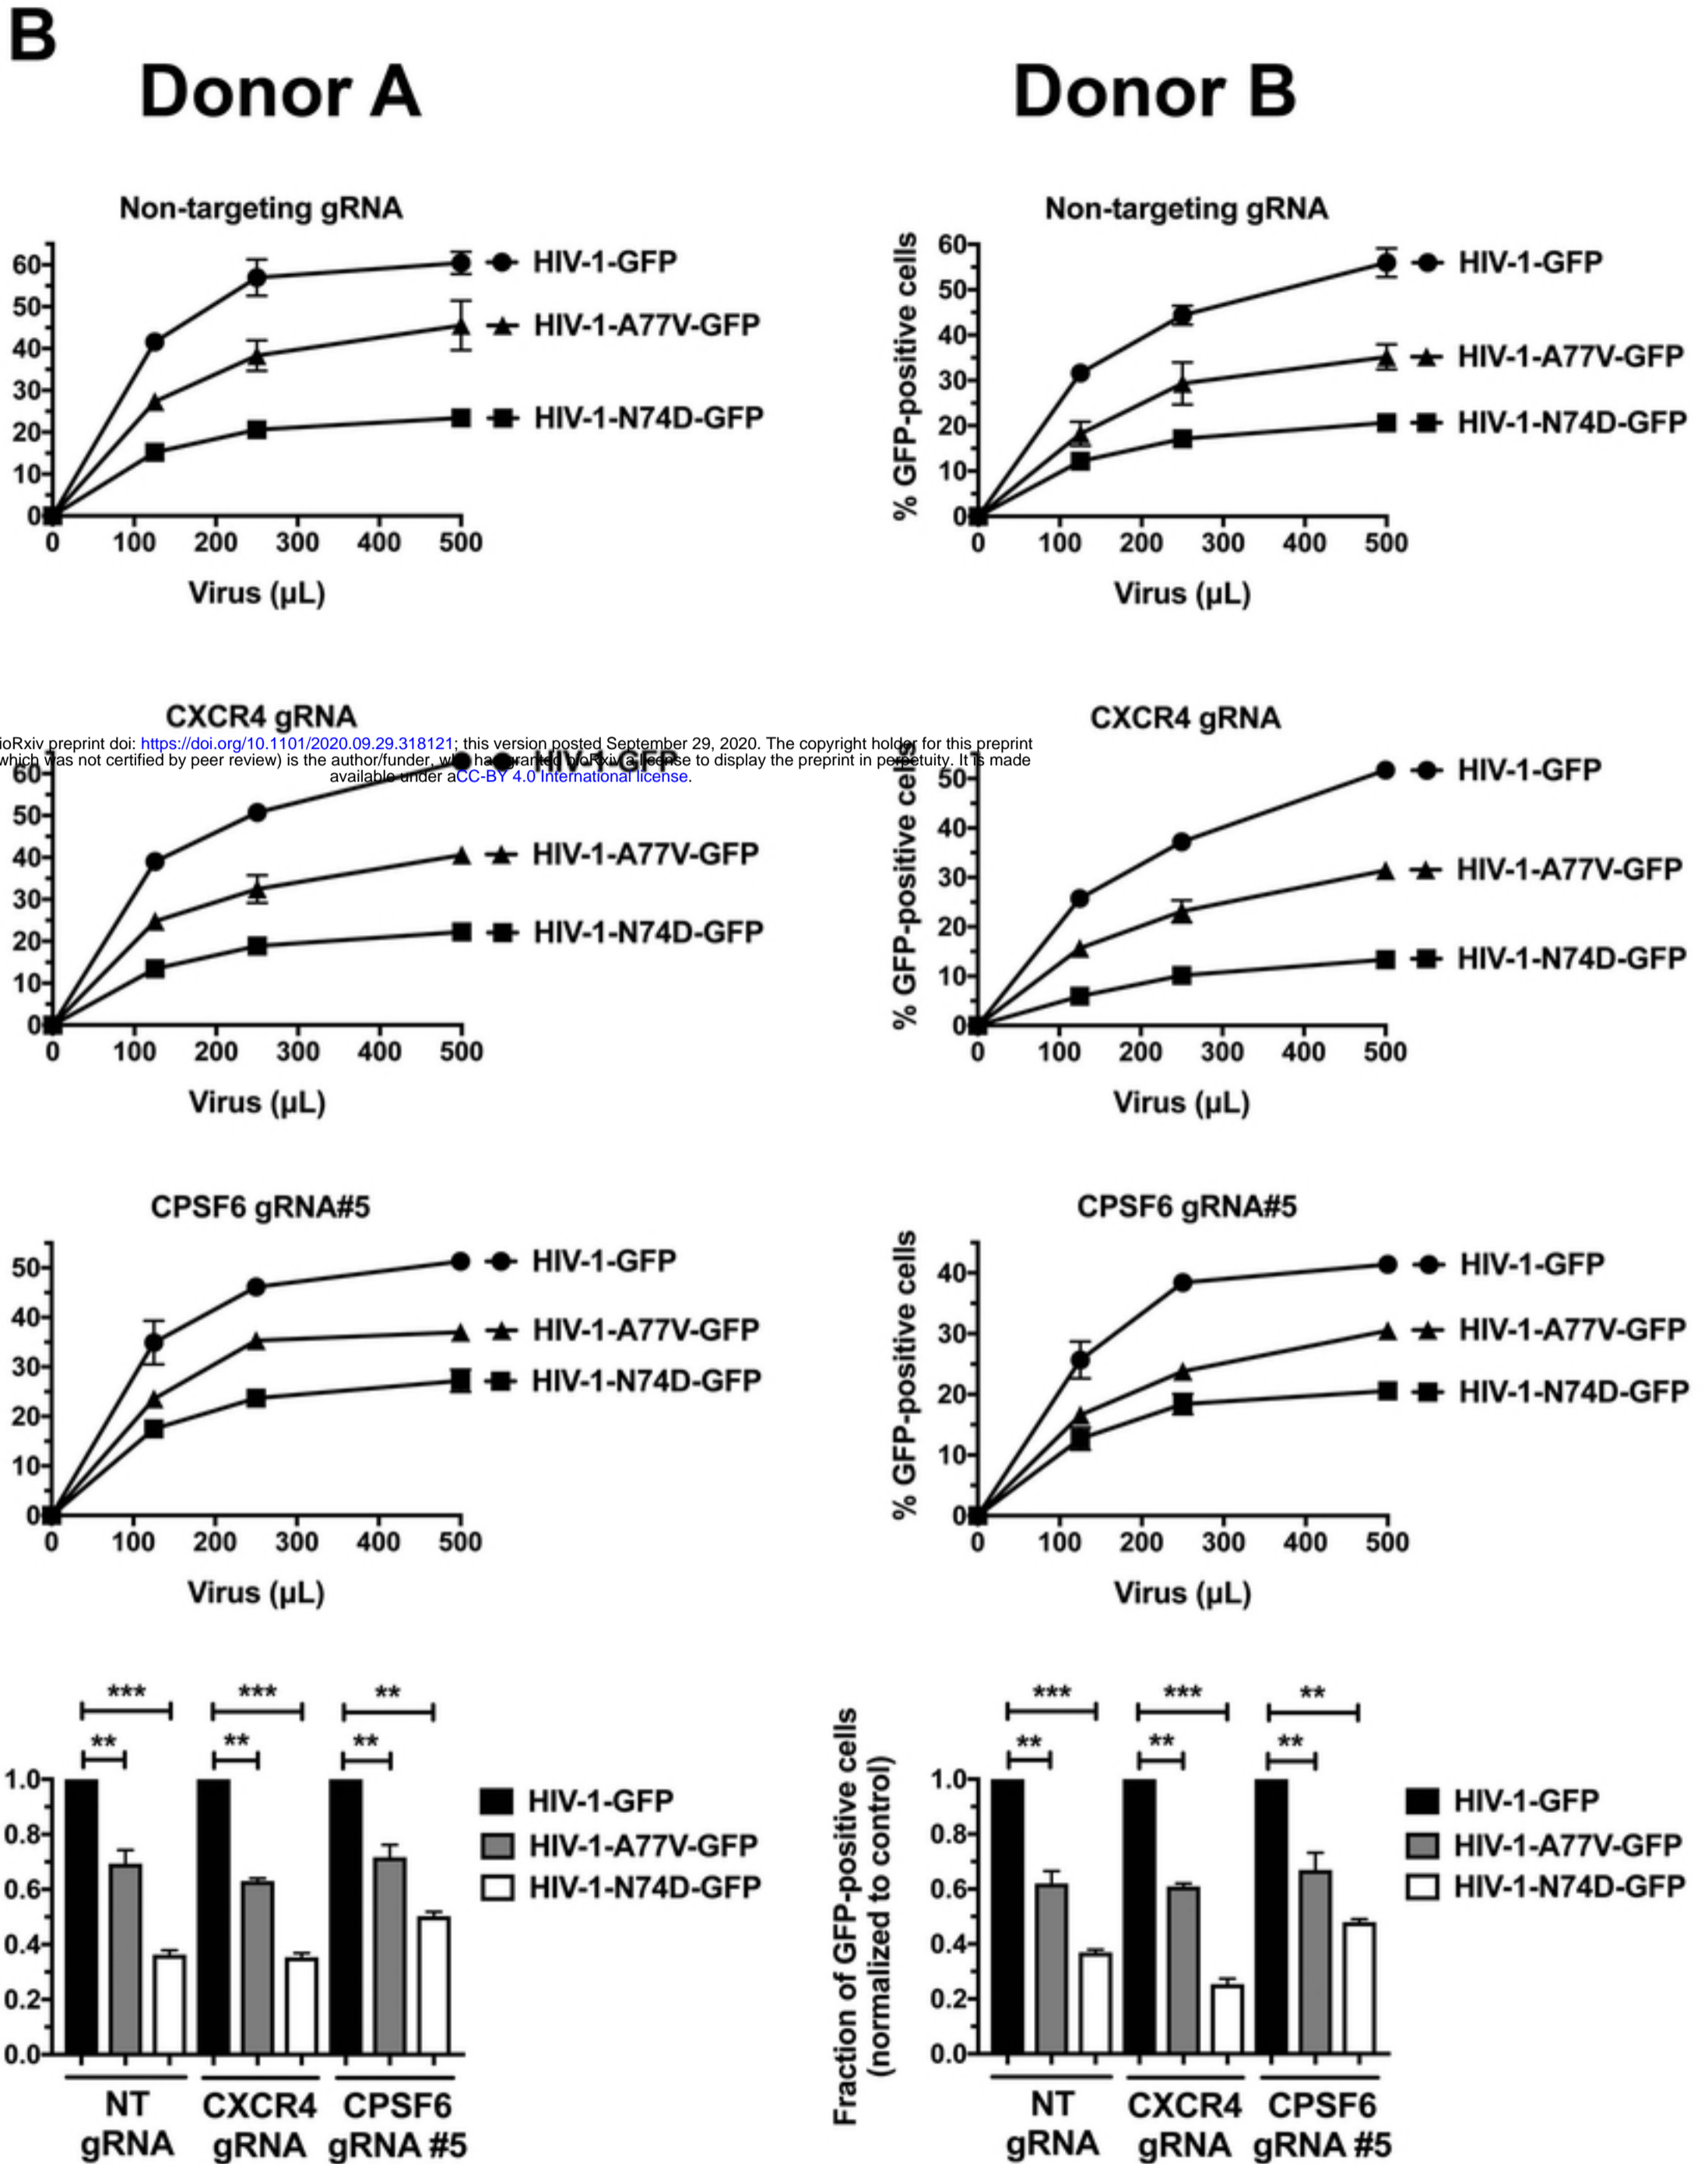

Figure 3B

**A**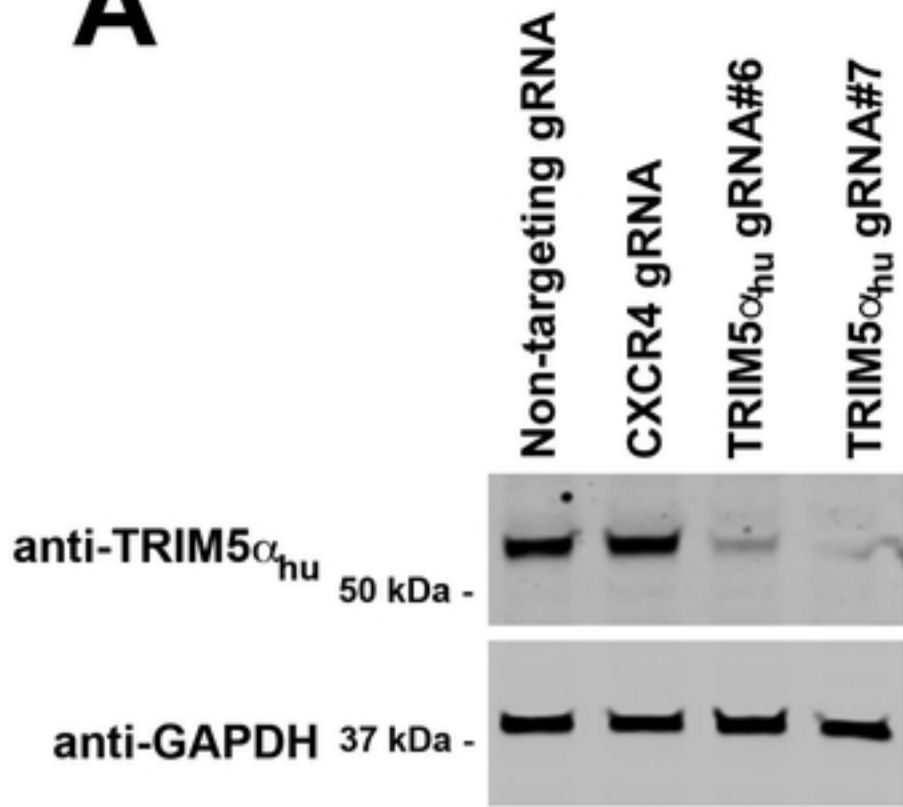**B**

bioRxiv preprint doi: <https://doi.org/10.1101/2020.09.29.318121>; this version posted September 29, 2020. The copyright holder for this preprint (which was not certified by peer review) is the author/funder, who has granted bioRxiv a license to display the preprint in perpetuity. It is made available under aCC-BY 4.0 International license.

**Figure 4**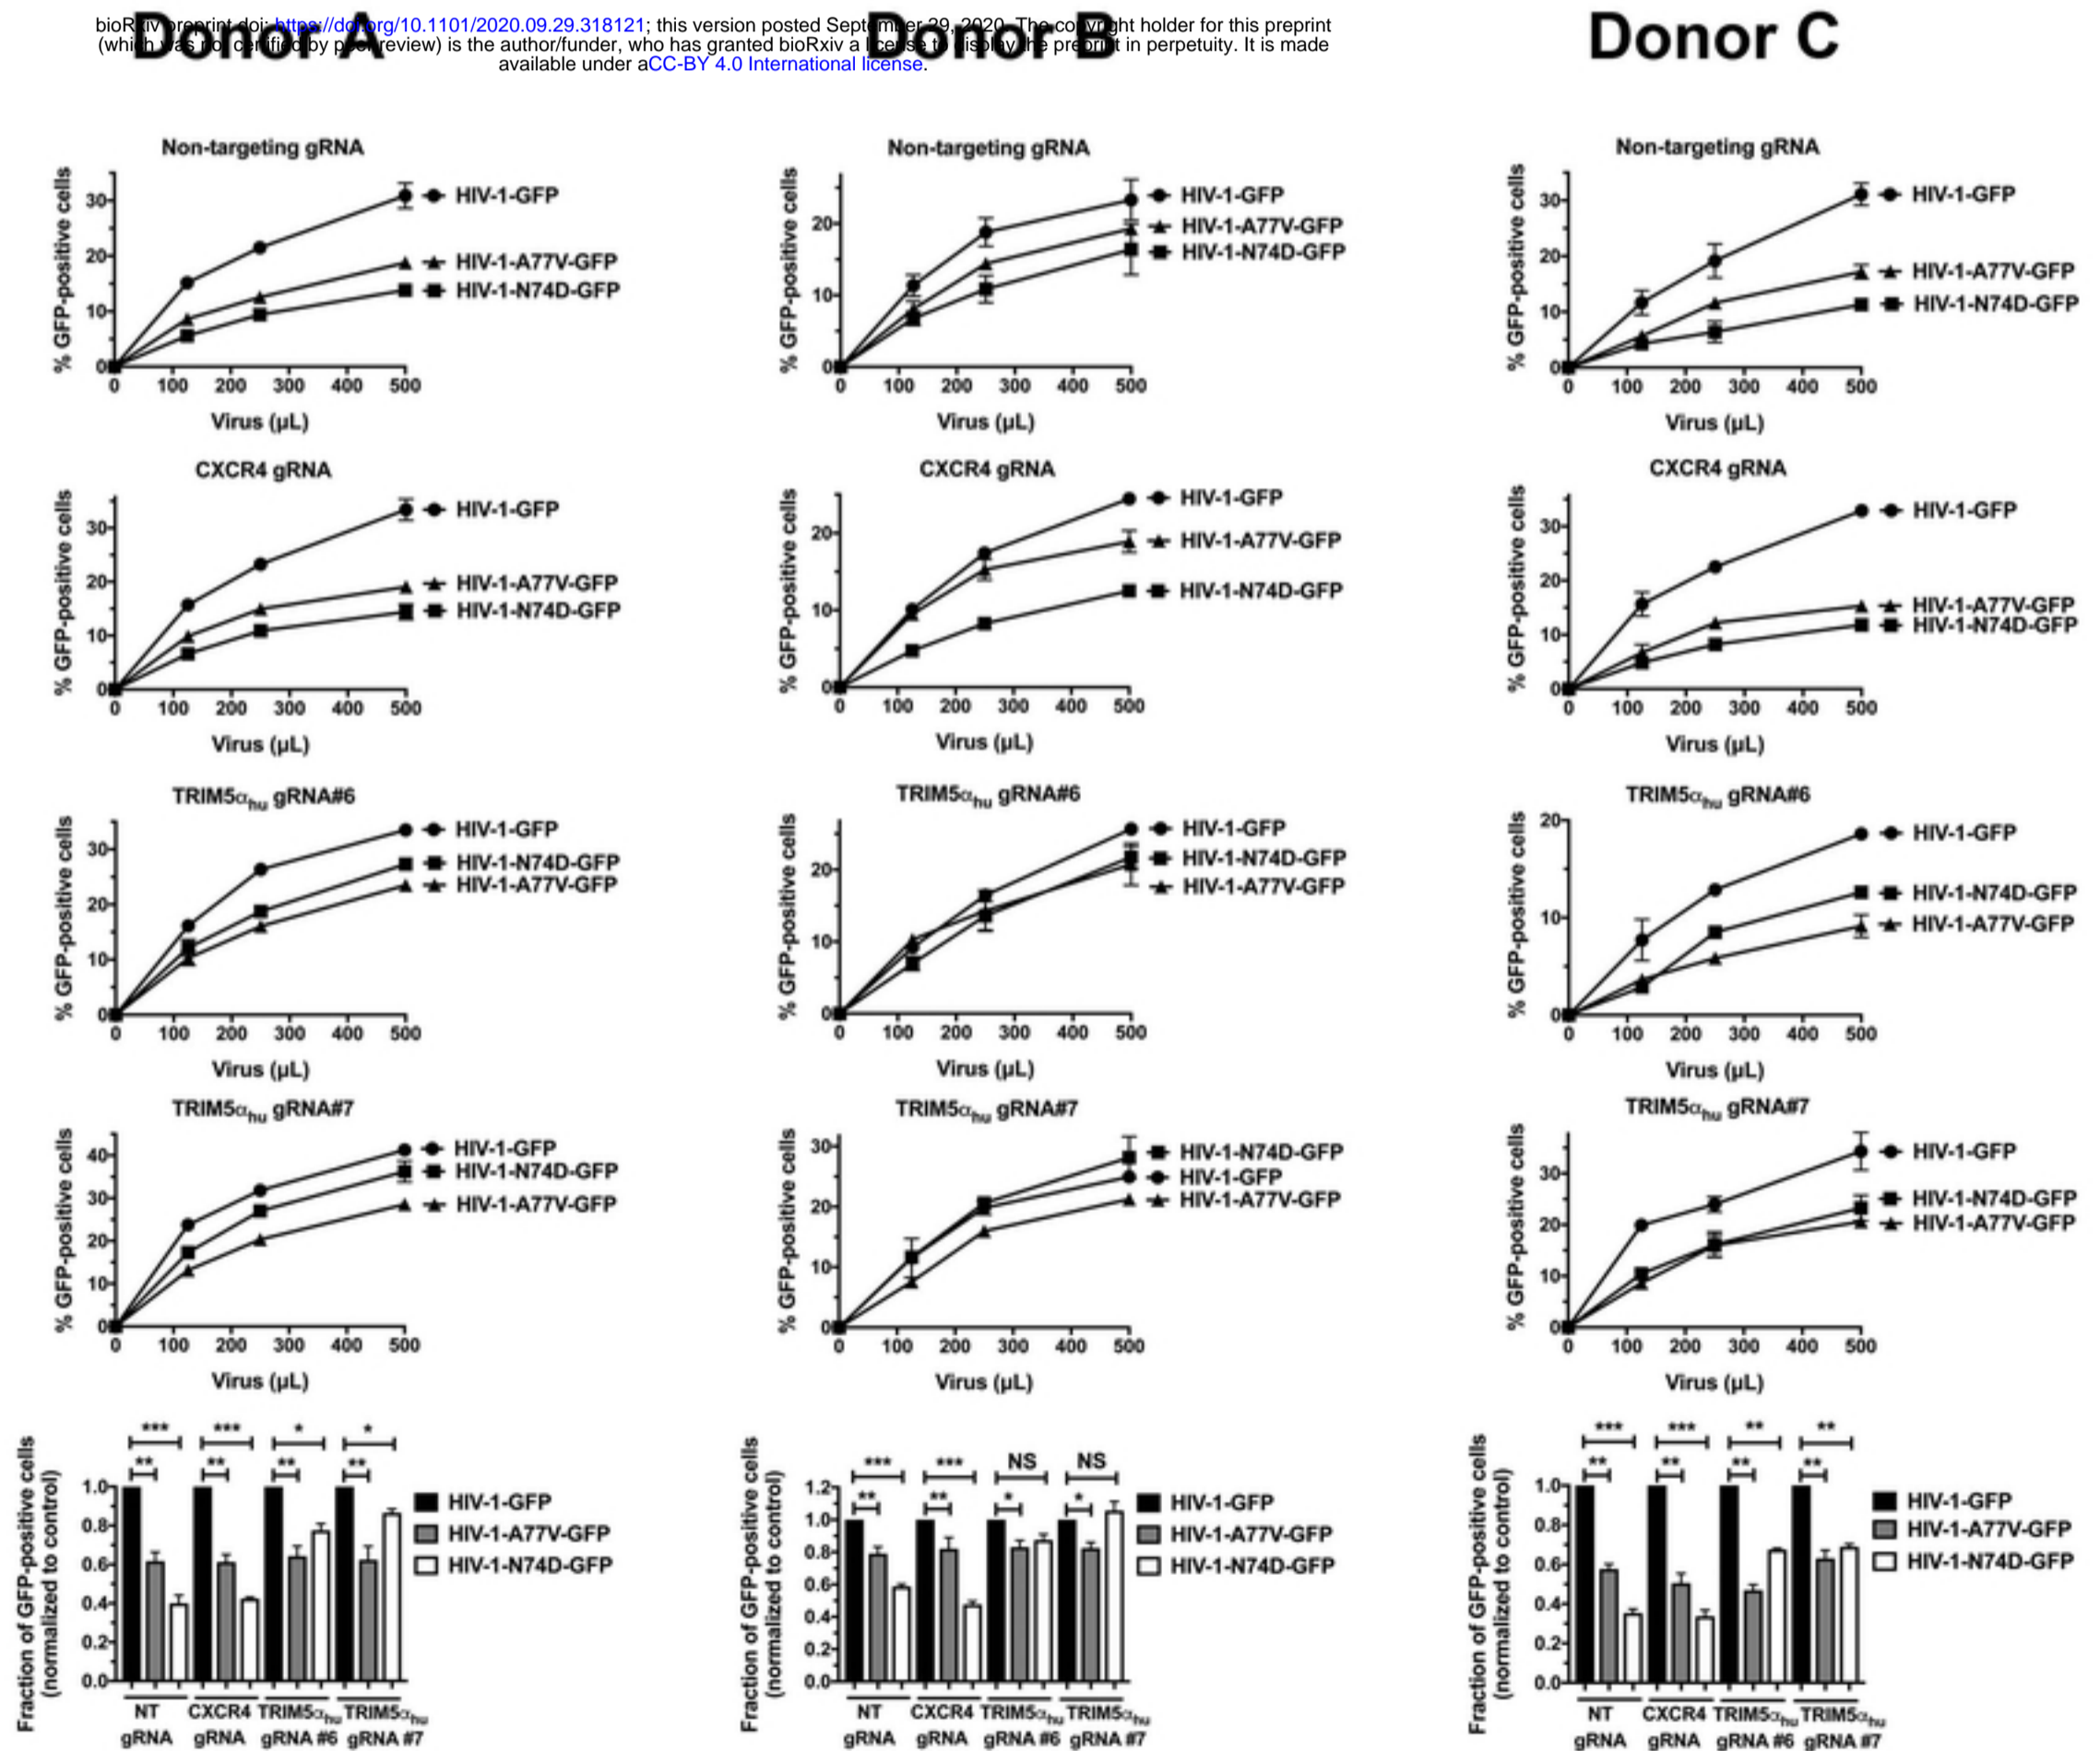**Figure 4**

bioRxiv preprint doi: <https://doi.org/10.1101/2020.09.29.318121>; this version posted September 29, 2020. The copyright holder for this preprint (which was not certified by peer review) is the author/funder, who has granted bioRxiv a license to display the preprint in perpetuity. It is made available under aCC-BY 4.0 International license.

HIV-1 capsid A14C/E45C: WT N74D A77V -  
TRIM5 $\alpha_{hu}$ -HA: + + + +

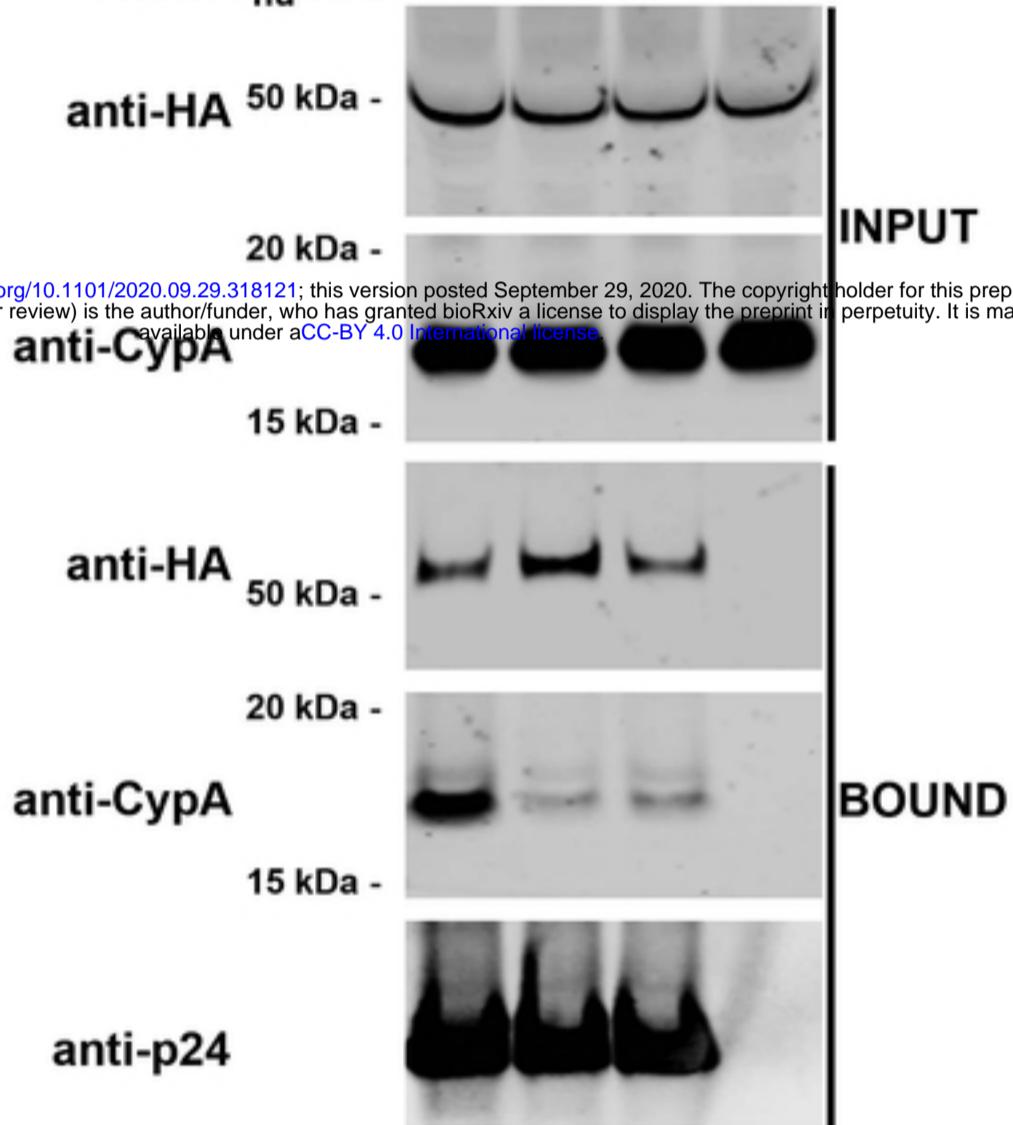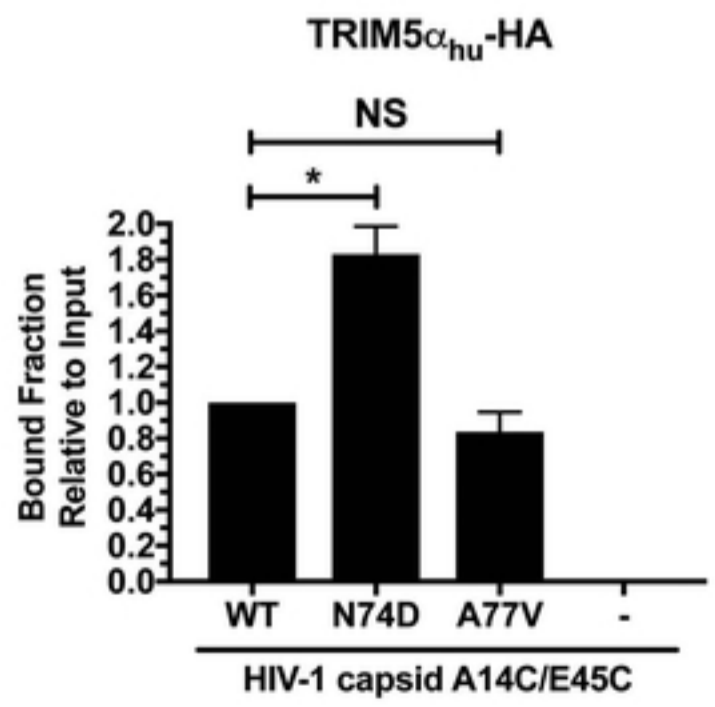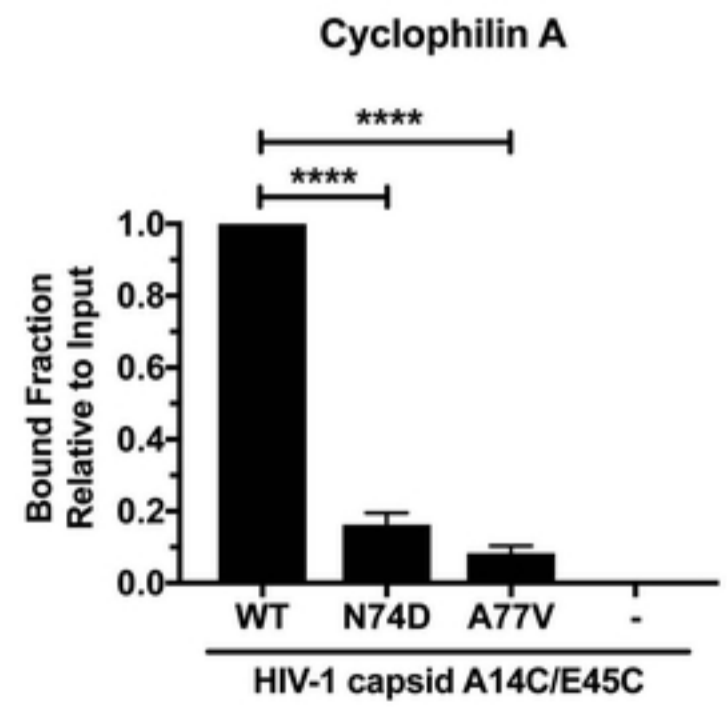

Figure 5

Figure 5
